# Supplementary material for: Childhood trauma and cognitive deficits in patients with schizophrenia: mediation by orbitofrontal cortex H-shaped sulci volume
Source: PubMed Central journal article supplement — J Psychiatry Neurosci. 2022 Jun 7;47(3):E209–17. doi: 10.1503/jpn.210178 (PMC9177195; doi:10.1503/jpn.210178), 2022-06-07
Supplement: 210178-at-1.pdf [file 210178-at-1.pdf]

**Appendix 1** to Wang L, Yin Y, Feng W, et al. Childhood trauma and cognitive deficits in schizophrenia patients: mediation by orbitofrontal cortex H-shaped sulci volume. *J Psychiatry Neurosci* 2022. doi: 10.1503/jpn.210178. Copyright © 2022 The Author(s) or their employer(s). To receive this resource in an accessible format, please contact us at cmajgroup@cmaj.ca. Online appendices are unedited and posted as supplied by the authors.

**Supplemental Table S1. Multivariate linear regression analysis for association between childhood trauma and left OFC H-shaped sulci volume for PFES**

| Variable          | PFES     |          | HC       |          |
|-------------------|----------|----------|----------|----------|
|                   | <i>t</i> | <i>p</i> | <i>t</i> | <i>p</i> |
| Emotional abuse   | 1.66     | 0.103    | -1.284   | 0.146    |
| Physical abuse    | -1.01    | 0.320    | 0.84     | 0.409    |
| Sexual abuse      | -1.52    | 0.134    | 0.184    | 0.432    |
| Emotional neglect | -2.16    | 0.036    | -0.32    | 0.752    |
| Physical neglect  | -2.26    | 0.028    | -1.41    | 0.166    |
| CTQ total score   | -2.53    | 0.014    | 0.76     | 0.450    |

Notes: CTQ, Childhood Trauma Questionnaire; MCCB, MATRICS Consensus Cognitive Battery; OFC, orbitofrontal cortex; PFES, patients with first-episode schizophrenia; HC, Healthy Controls.

**Supplemental Table S2. Multivariate linear regression analysis for association between childhood trauma and right OFC H-shaped sulci volume for PFES**

| Variable          | PFES     |          | HC       |          |
|-------------------|----------|----------|----------|----------|
|                   | <i>t</i> | <i>p</i> | <i>t</i> | <i>p</i> |
| Emotional abuse   | 1.46     | 0.151    | 0.82     | 0.416    |
| Physical abuse    | 2.05     | 0.046    | -0.56    | 0.577    |
| Sexual abuse      | -0.03    | 0.977    | -0.75    | 0.459    |
| Emotional neglect | -0.35    | 0.727    | -0.49    | 0.631    |
| Physical neglect  | -1.44    | 0.155    | -0.16    | 0.875    |
| CTQ total score   | -1.60    | 0.116    | -0.31    | 0.757    |

Notes: CTQ, Childhood Trauma Questionnaire; MCCB, MATRICS Consensus Cognitive Battery; OFC, orbitofrontal cortex; PFES, patients with first-episode schizophrenia; HC, Healthy Controls.

**Supplemental Table S3. Multivariate linear regression analysis for association between subtypes of childhood trauma and MCCB score**

| Dependent                | PFES           |                |                 |                 |                | HC             |                |                |                  |                  |
|--------------------------|----------------|----------------|-----------------|-----------------|----------------|----------------|----------------|----------------|------------------|------------------|
|                          | EA             | PA             | SA              | EN              | PN             | EA             | PA             | SA             | EN               | PN               |
|                          | <i>t</i>       | <i>t</i>       | <i>t</i>        | <i>t</i>        | <i>t</i>       | <i>t</i>       | <i>t</i>       | <i>t</i>       | <i>t</i>         | <i>t</i>         |
|                          | <i>p</i>       | <i>p</i>       | <i>p</i>        | <i>p</i>        | <i>p</i>       | <i>p</i>       | <i>p</i>       | <i>p</i>       | <i>p</i>         | <i>p</i>         |
| Speed of Processing      | -0.57<br>0.573 | 1.66<br>0.103  | -0.87<br>0.388  | -0.86<br>0.393  | -0.72<br>0.473 | -0.36<br>0.721 | 1.43<br>0.160  | 0.77<br>0.446  | -0.84<br>0.406   | 1.71<br>0.096    |
| Attention/Vigilance      | -0.86<br>0.394 | 1.58<br>0.12   | -1.60<br>0.116  | -0.97<br>0.335  | -0.71<br>0.480 | 1.34<br>0.189  | 0.17<br>0.870  | -0.50<br>0.618 | -1.50<br>0.142   | 1.54<br>0.131    |
| Working Memory           | -0.47<br>0.643 | 1.37<br>0.176  | -2.23<br>0.030* | -1.88<br>0.066  | 0.17<br>0.865  | -1.00<br>0.339 | 1.41<br>0.168  | 0.18<br>0.861  | -1.00<br>0.323   | 2.31<br>0.027*   |
| Verbal Learning          | 1.10<br>0.275  | 1.30<br>0.200  | -1.20<br>0.236  | -1.96<br>0.055  | 0.02<br>0.983  | 1.37<br>0.178  | 0.59<br>0.558  | 0.36<br>0.724  | -0.44<br>0.666   | 0.517<br>0.608   |
| Visual Learning          | -0.94<br>0.349 | 1.39<br>0.171  | -1.76<br>0.084  | -2.23<br>0.030* | 0.68<br>0.498  | 0.74<br>0.466  | -0.28<br>0.782 | 0.29<br>0.775  | 0.61<br>0.543    | 4.49<br><0.001** |
| Reason & Problem Solving | 0.14<br>0.889  | 0.68<br>0.497  | -1.46<br>0.152  | -1.97<br>0.054  | -1.20<br>0.235 | 0.69<br>0.495  | 0.44<br>0.664  | 0.25<br>0.805  | -2.68<br>0.011** | 0.18<br>0.860    |
| Social Cognition         | 0.31<br>0.760  | -0.01<br>0.991 | 0.41<br>0.686   | -0.17<br>0.864  | -0.91<br>0.366 | 0.55<br>0.583  | 0.20<br>0.843  | 0.66<br>0.515  | -1.38<br>0.176   | 0.58<br>0.565    |
| MCCB total score         | -0.16<br>0.872 | 1.90<br>0.063  | -1.97<br>0.054  | -2.49<br>0.016* | -0.47<br>0.644 | 1.24<br>0.225  | 1.10<br>0.279  | 0.71<br>0.484  | -1.83<br>0.076   | 2.59<br>0.014**  |

Notes: CTQ, Childhood Trauma Questionnaire; EA, emotional abuse; PA, physical abuse; SA sexual abuse; EN, emotional neglect; PN, physical neglect; MCCB, MATRICS Consensus Cognitive Battery; OFC, orbitofrontal cortex; PFES, patients with first-episode schizophrenia; HC, Healthy Controls. \*nominal significance at  $p < 0.05$ , \*\*false discovery rate corrected significance at  $q < 0.05$ .

**Supplemental Table S4. General linear regression analysis for association between CTQ total score and MCCB score**

| Dependent                | PFES     |          | HC       |          |
|--------------------------|----------|----------|----------|----------|
|                          | <i>t</i> | <i>p</i> | <i>t</i> | <i>p</i> |
| Speed of Processing      | -1.33    | 0.191    | 1.37     | 0.179    |
| Attention/Vigilance      | -2.13    | 0.038*   | 1.17     | 0.245    |
| Working Memory           | -2.56    | 0.013    | 0.71     | 0.058    |
| Verbal Learning          | -0.36    | 0.717    | 1.95     | 0.219    |
| Visual Learning          | -2.60    | 0.012**  | 3.14     | 0.003**  |
| Reason & Problem Solving | -2.58    | 0.013**  | -1.25    | 0.219    |
| Social Cognition         | -0.12    | 0.907    | 0.076    | 0.940    |
| MCCB total score         | -2.44    | 0.018**  | 1.86     | 0.071    |

Notes: CTQ, Childhood Trauma Questionnaire; MCCB, MATRICS Consensus Cognitive Battery; PFES,

**Appendix 1** to Wang L, Yin Y, Feng W, et al. Childhood trauma and cognitive deficits in schizophrenia patients: mediation by orbitofrontal cortex H-shaped sulci volume. *J Psychiatry Neurosci* 2022. doi: 10.1503/jpn.210178. Copyright © 2022 The Author(s) or their employer(s). To receive this resource in an accessible format, please contact us at cmajgroup@cmaj.ca. Online appendices are unedited and posted as supplied by the authors.

patients with first-episode schizophrenia; HC, Healthy Controls. \*nominal significance at  $p < 0.05$ , \*\*false discovery rate corrected significance at  $q < 0.05$ .

**Supplemental Table S5. General linear regression analysis for association between left OFC H-shaped sulci volume and MCCB score**

| Dependent                | PFES     |          | HC       |          |
|--------------------------|----------|----------|----------|----------|
|                          | <i>t</i> | <i>p</i> | <i>t</i> | <i>p</i> |
| Speed of Processing      | 2.54     | 0.014**  | 0.29     | 0.775    |
| Attention/Vigilance      | 1.82     | 0.075    | 0.51     | 0.614    |
| Working Memory           | 2.45     | 0.017**  | 1.53     | 0.133    |
| Verbal Learning          | 1.14     | 0.260    | 0.66     | 0.516    |
| Visual Learning          | 2.29     | 0.026*   | -0.10    | 0.919    |
| Reason & Problem Solving | 1.23     | 0.223    | 1.56     | 0.126    |
| Social Cognition         | 1.83     | 0.072    | -0.42    | 0.417    |
| MCCB total score         | 3.09     | 0.003**  | 0.88     | 0.387    |

Notes: CTQ, Childhood Trauma Questionnaire; MCCB, MATRICS Consensus Cognitive Battery; PFES, patients with first-episode schizophrenia; HC, Healthy Controls; OFC, orbitofrontal cortex. \*nominal significance at  $p < 0.05$ , \*\*false discovery rate corrected significance at  $q < 0.05$ .

**Supplemental Table S6. General linear regression analysis for association between right H-shaped sulci volume and MCCB score**

| Dependent                | PFES     |          | HC       |          |
|--------------------------|----------|----------|----------|----------|
|                          | <i>t</i> | <i>p</i> | <i>t</i> | <i>p</i> |
| Speed of Processing      | 1.42     | 0.161    | -0.29    | 0.775    |
| Attention/Vigilance      | 0.80     | 0.425    | 0.16     | 0.871    |
| Working Memory           | -0.55    | 0.583    | 0.40     | 0.695    |
| Verbal Learning          | 0.35     | 0.725    | 0.397    | 0.693    |
| Visual Learning          | 1.75     | 0.085    | 0.09     | 0.929    |
| Reason & Problem Solving | 0.46     | 0.650    | 1.56     | 0.126    |
| Social Cognition         | 1.21     | 0.233    | 0.65     | 0.571    |
| MCCB total score         | 1.14     | 0.259    | 0.71     | 0.483    |

Notes: CTQ, Childhood Trauma Questionnaire; MCCB, MATRICS Consensus Cognitive Battery; PFES, patients with first-episode schizophrenia; HC, Healthy Controls; OFC, orbitofrontal cortex.

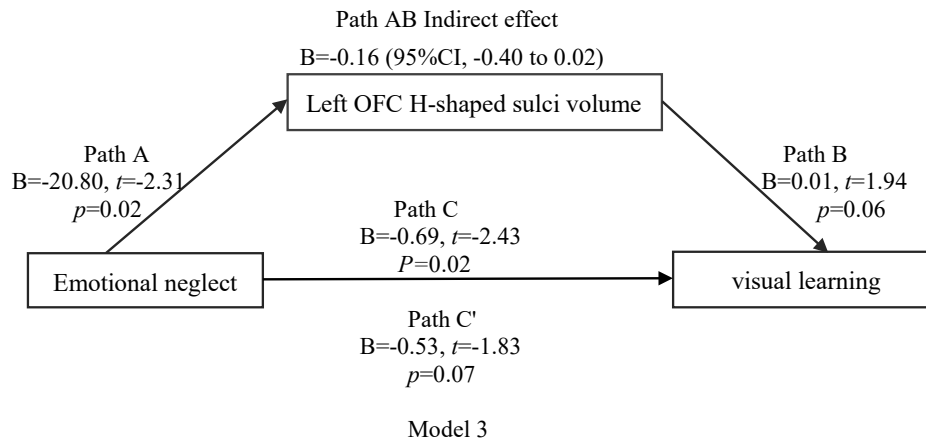

Supplementary Figure 1 shows Model 3 Path diagram of the mediation model (X = emotional neglect; Y = visual learning; left OFC H-shaped volume as mediators). Path C' and Path C represent the direct and total effect between emotional neglect and left H-shaped sulci volume. Path AB represents the mediation effect, but it is not significant.

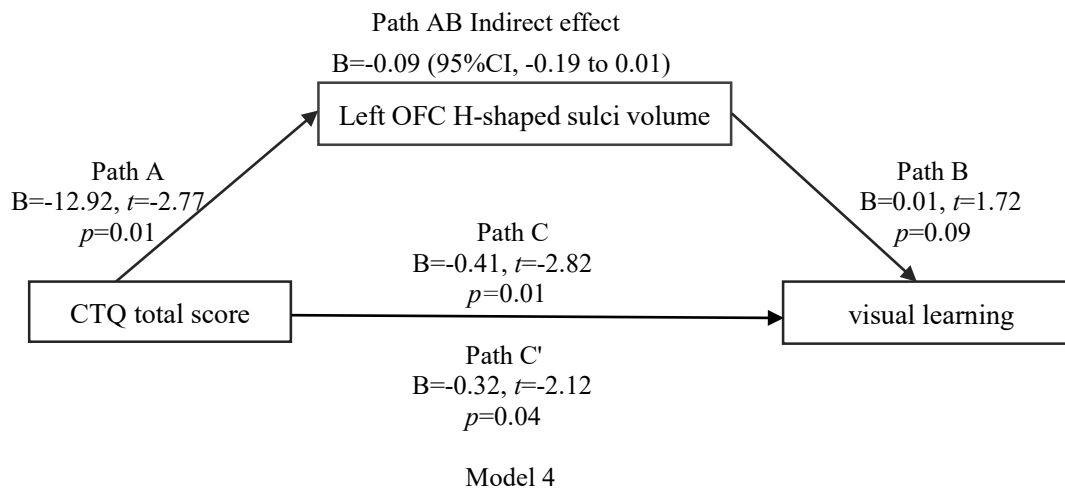

Supplementary Figure 2 shows Model 4 Path diagram of the mediation model (X = CTQ total score; Y = visual learning; left OFC H-shaped volume as mediators). Path C' and Path C represent the direct and total effect between emotional neglect and left H-shaped sulci volume. Path AB represents the mediation effect, but it is not significant.
